# Supplementary material for: Water Distribution Systems in Pig Farm Buildings: Critical Elements of Design and Management
Source: MDPI journal article supplement (doi:10.3390/ani11113268), 2021-11-15
Supplement: s1 [file s1]

Water Distribution Systems in Pig Farm Buildings: Critical Elements of Design and Management  
Stephen Little, Andrew Woodward, Glenn Browning and Helen Billman-Jacobe

**Table S5.** Aspects of water provision to growing pigs for which recommendations would be valuable in pig industry guidelines available to farm managers

| Aspect of water provision:                                                                      | Recommendations for:                                                                                                                                                                                                                                                                                                                                                                                                                                                                                                                                                                                                                 |
|-------------------------------------------------------------------------------------------------|--------------------------------------------------------------------------------------------------------------------------------------------------------------------------------------------------------------------------------------------------------------------------------------------------------------------------------------------------------------------------------------------------------------------------------------------------------------------------------------------------------------------------------------------------------------------------------------------------------------------------------------|
| WDS biofilm management / disinfection                                                           | <ul style="list-style-type: none"> <li>• The frequencies that each building's WDS should be routinely cleaned and sanitised using a suitable disinfectant product administered through a dosing pump or header tank, as well as events that should trigger cleaning/sanitising of a WDS (e.g. contamination)</li> <li>• The procedure and equipment for cleaning/sanitising a WDS via a dosing pump or header tank, ensuring sufficient contact time</li> <li>• When continuous water sanitisation should be considered as a farm biosecurity strategy</li> </ul>                                                                    |
| Possible modifications to existing WDSs in pig buildings to improve their hydraulic performance | <ul style="list-style-type: none"> <li>• Placement of non-return valves, pressure regulators, water pressure gauges, water flow meters and gate valves at appropriate points along main pipelines</li> <li>• Removal of unnecessary fittings, constrictions and expansions along main pipelines that may be causing friction losses</li> <li>• Replacement of pipe sections that are of excessive diameter with sections of smaller diameter</li> <li>• Installation of additional pipe sections to a branched WDS in a large conventional building to convert it into a looped system</li> </ul>                                    |
| Monitoring of the water supply to pigs                                                          | <ul style="list-style-type: none"> <li>• Installation and use of metering systems to monitor the water usage of pigs in each building and the farm's water use efficiency</li> <li>• Installation of remote systems to alert farm staff to pump failures and leaking or burst pipes</li> </ul>                                                                                                                                                                                                                                                                                                                                       |
| Drinkers in large pens and small pens within conventional buildings and eco-shelters            | <ul style="list-style-type: none"> <li>• The maximum number of weaners and grower/finishers per drinker and optimal positioning of drinkers within large pens (&gt;100 pigs) in relation to feeders, lying and dunging areas</li> <li>• The maximum number of weaners and grower/finishers per drinker and optimal positioning of drinkers within small pens (20-40 pigs) in relation to feeders, lying and dunging areas</li> <li>• Provision of a third drinker in small weaner pens, even if the number of weaner pigs per drinker is below the recommended maximum of 10, to assist newly weaned pigs to access water</li> </ul> |
| Water flow rates from nipple drinkers                                                           | <ul style="list-style-type: none"> <li>• The frequencies that flow rates from nipple drinkers in a building should be checked using a finger, and measured quantitatively</li> <li>• The procedure, equipment and best time of day for quantitatively measuring water flow rates from a representative number of drinkers in a building</li> </ul>                                                                                                                                                                                                                                                                                   |

| Aspect of water provision: | Recommendations for:                                                                                                                                                                                                                                                                                                                                                                                                                                                                                          |
|----------------------------|---------------------------------------------------------------------------------------------------------------------------------------------------------------------------------------------------------------------------------------------------------------------------------------------------------------------------------------------------------------------------------------------------------------------------------------------------------------------------------------------------------------|
| Water quality testing      | <ul style="list-style-type: none"> <li>• The frequency that water samples should be collected at the point of consumption by pigs (i.e. drinkers) and at its source for chemical and microbiological analysis</li> <li>• The procedure and equipment for collecting water samples aseptically for chemical and microbiological analysis and submitting them to an accredited water testing laboratory</li> </ul>                                                                                              |
| Farm water security        | <ul style="list-style-type: none"> <li>• The minimum volume of water (expressed in numbers of days of total pig usage) that should reasonably be held in on-farm water storage facilities (dams, tanks) for use if access to water from an external source is interrupted due to a power outage or mechanical failure</li> <li>• Access to alternative water sources, should supply of the primary water source become limited at any time or its quality fall below acceptable standards for pigs</li> </ul> |
