# Supplementary material for: Water Distribution Systems in Pig Farm Buildings: Critical Elements of Design and Management
Source: MDPI journal article supplement (doi:10.3390/ani11113268), 2021-11-15
Supplement: s1 [file s1]

# Water Distribution Systems in Pig Farm Buildings: Critical Elements of Design and Management.

Stephen Little, Andrew Woodward, Glenn Browning and Helen Billman-Jacobe

**Table S4. Final coding framework (NVivo™)**

## Infrastructure

- Water sources
- On-farm water storages
- Pipelines and fittings
- Drinking appliances in pens
- Strategies used to improve [changes]

---

## Water supply and usage by pigs

- Day's usage in on-farm storage
- Pigs' daily water demand
- Peak demand periods each day
- Water wastage by pigs
- Water quality
- Hygiene management
- Problems encountered with water system and dosing equipment

---

## Antibiotic administration to pigs

- Dosing equipment
- Vet scripts and dosage calculations
- Timing and duration of dosing events
  - Outbreaks vs. metaphylaxis
- Antibiotics and other products administered
  - In-water vs. in-feed
- Problems / preferences
- Effectiveness of dosing events
  - Factors contributing to variability in antibiotic exposure among pigs in a group
- Strategies used to improve [changes]
